# Supplementary material
Source: publisher site journal article supplement (https://www.dovepress.com/get_supplementary_file.php?f=215802.docx)
Supplement: Supplementary file 1 [file get_supplementary_file.php]

Supplementary materials

**Figure S1** Intensity particle size distribution of nanoparticles without crosslinking (A) and with crosslinking (B) dispersed in 1% acetic acid solution (N/P ratio=2.5).


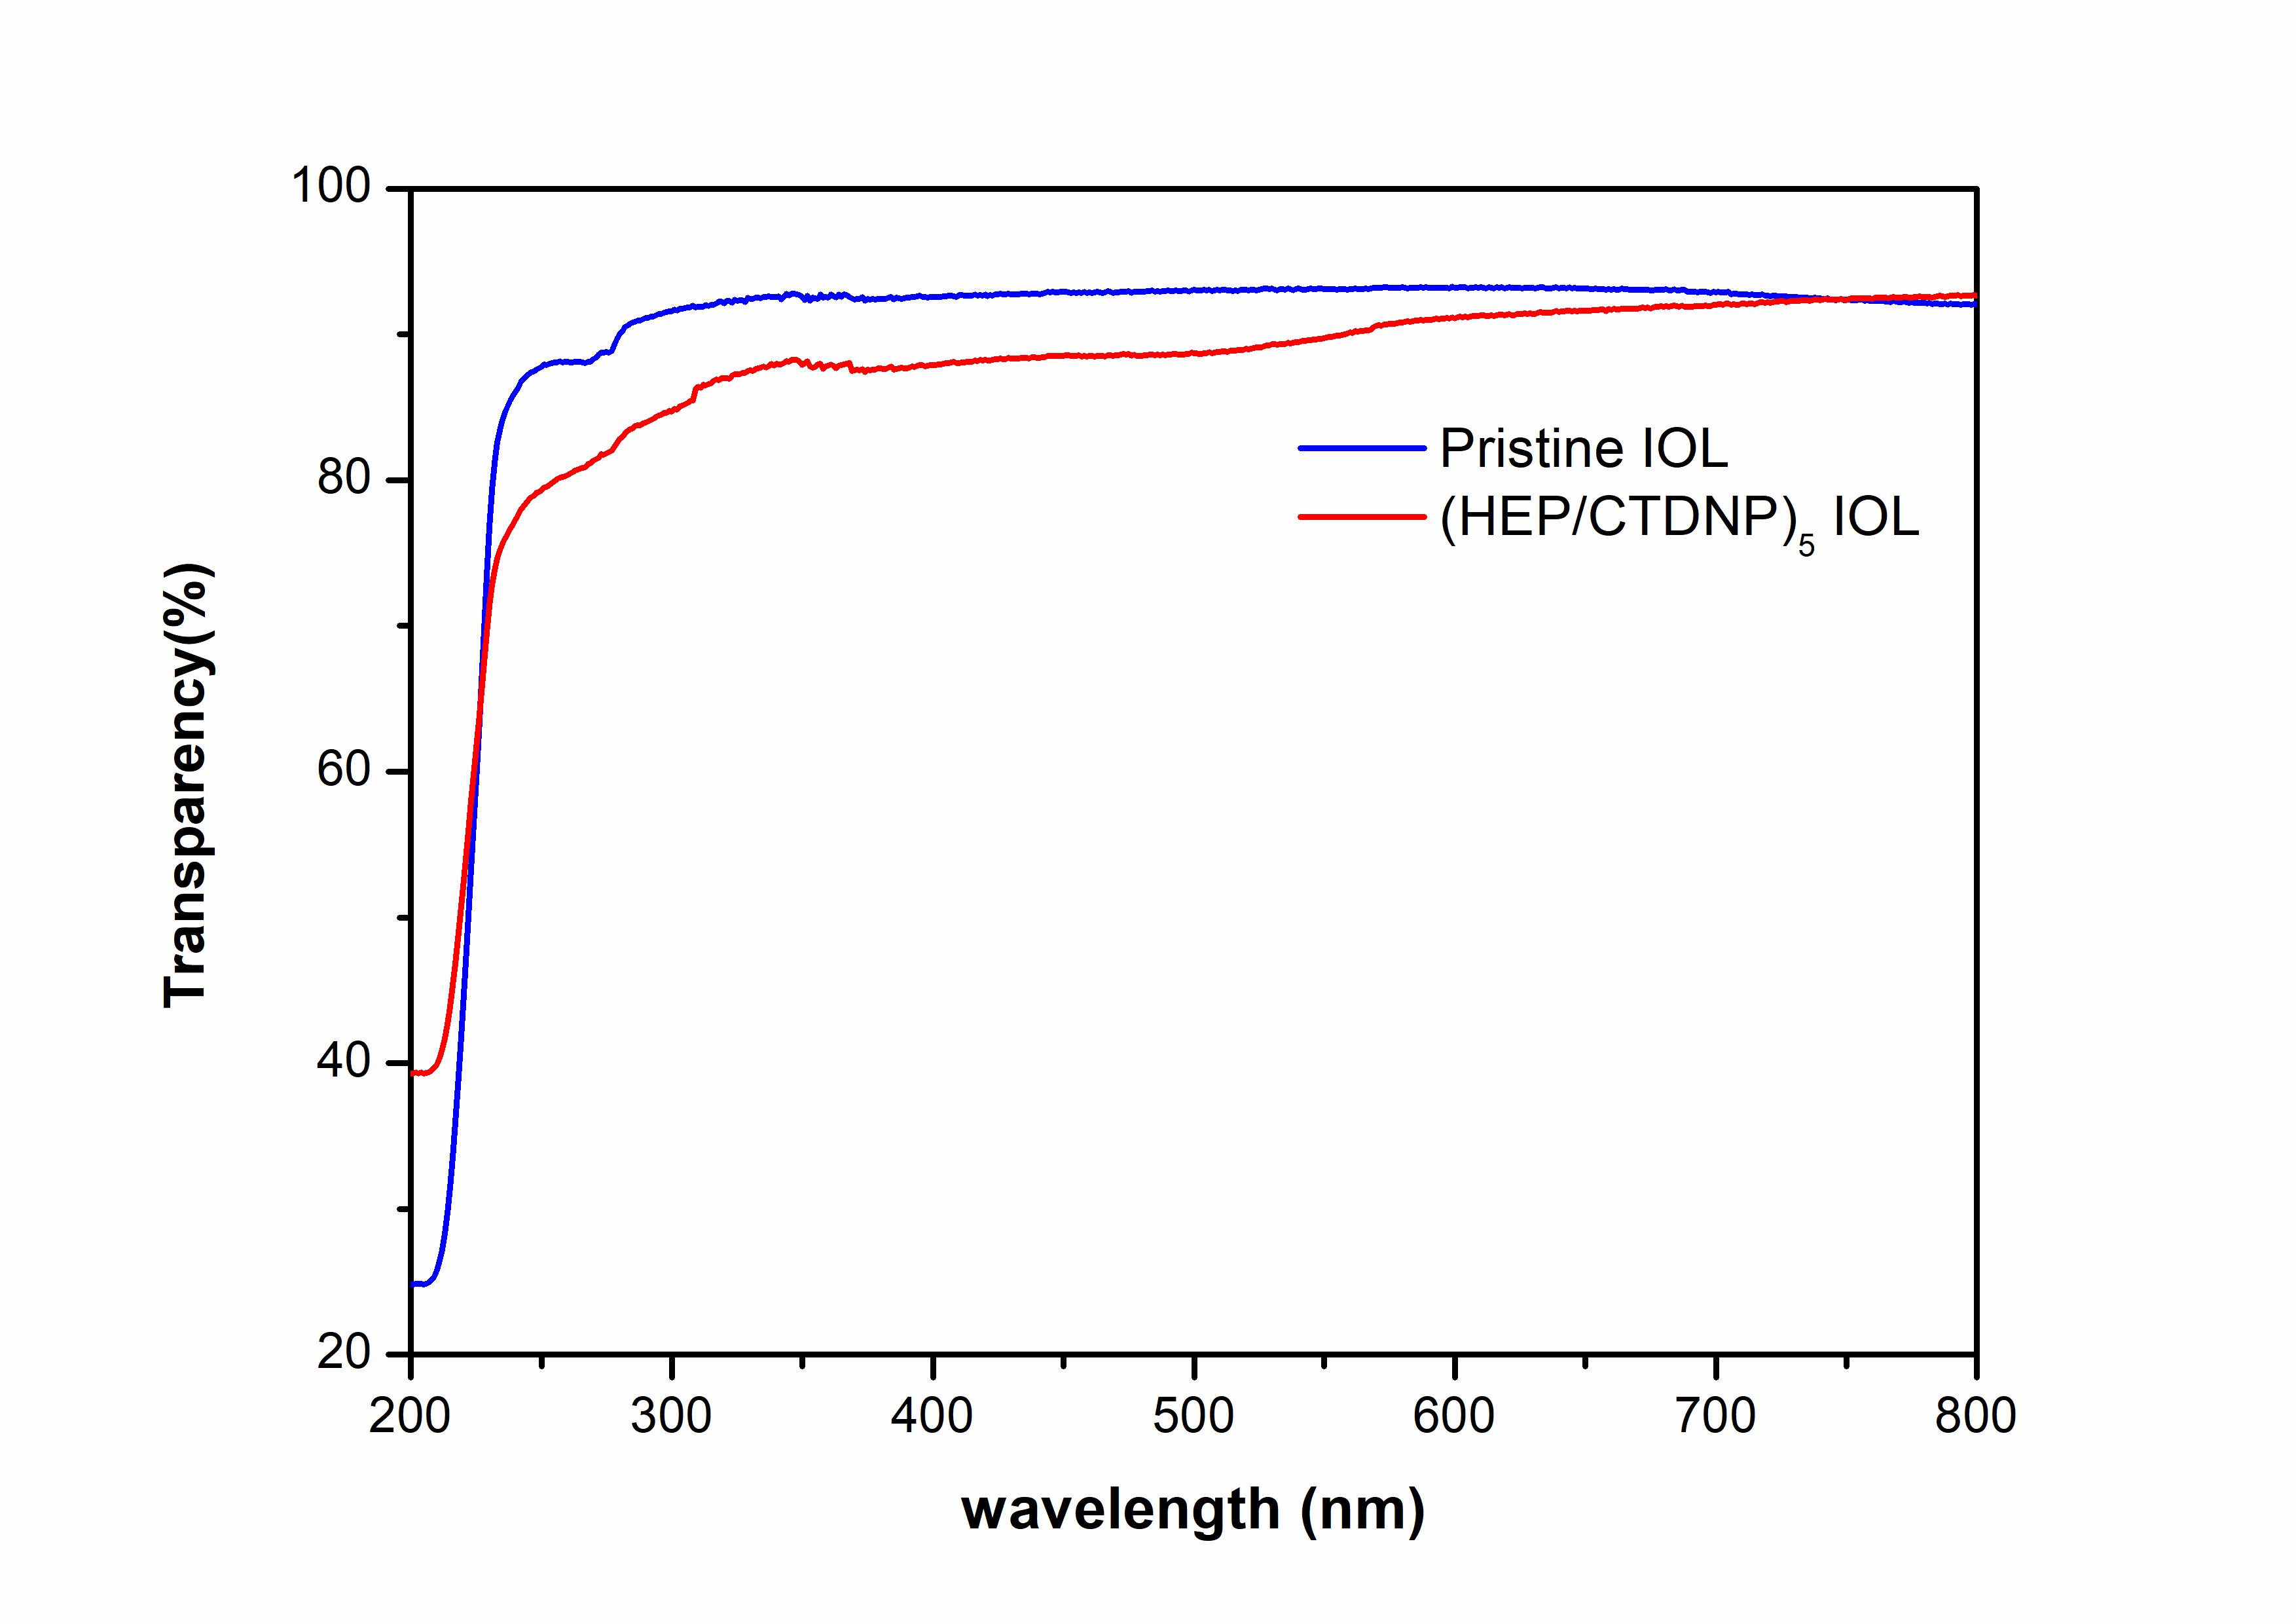


**Figure S2** Light transmission curve of Pristine IOL and (HEP/CTDNP)5-IOL
